# Supplementary material for: Acquiring hybrid molecular crystal materials through high-throughput screening
Source: Royal Society of Chemistry journal article supplement (doi:10.1039/d5tc00539f), 2025-01-01
Supplement: d5tc00539f1.pdf [file d5tc00539f1.pdf]

# Supplementary Information: Acquiring hybrid molecular crystal materials through high-throughput screening

Yu-Han Yang<sup>1†</sup>, Yao-Long Kang<sup>1†</sup>, Zi-Ye Li<sup>1</sup>, Jia-Bin Liu<sup>1</sup>, Fu-Sheng Zhang<sup>1</sup>, Chen-Dong Jin<sup>1</sup>, Rui-Ning Wang<sup>1</sup>, Xing-Qiang Shi<sup>1</sup> and Jiang-Long Wang<sup>1</sup>, Peng-Lai Gong<sup>1,\*</sup>

<sup>1</sup>Key Laboratory of Optic-Electronic Information and Materials of Hebei Province, Hebei Research Center of the Basic Discipline for Computational Physics, College of Physics Science and Technology, Hebei University, Baoding 071002, P. R. China

## Contents

|                                                                                                                              |   |
|------------------------------------------------------------------------------------------------------------------------------|---|
| Table S1. Number of molecular crystals found through RG <sup>2</sup> search .....                                            | 2 |
| Figure S1. The primitive cell of As <sub>2</sub> O <sub>3</sub> and Sb <sub>2</sub> O <sub>3</sub> .....                     | 2 |
| Figure S2. Decomposition diagram of molecular cage (As <sub>4</sub> O <sub>6</sub> or Sb <sub>4</sub> O <sub>6</sub> ) ..... | 3 |
| Figure S3. The primitive cell of $F\bar{4}3m$ -id0 and $F\bar{4}3m$ -id1 .....                                               | 3 |
| Figure S4. Example of different molecular cages .....                                                                        | 3 |
| Table S2. Description of the molecular cages searched by RG <sup>2</sup> .....                                               | 4 |
| Figure S5. The first Brillouin zone diagram .....                                                                            | 4 |
| Figure S6. HSE06 Band structures of As <sub>2</sub> O <sub>3</sub> and Sb <sub>2</sub> O <sub>3</sub> .....                  | 4 |
| Table S3. POSCAR of stable hybrid molecular crystal $F\bar{4}3m$ -id0 primitive cell .....                                   | 5 |
| Note S1: The volume calculation of molecular cages .....                                                                     | 5 |
| Table S4. The distance between the neighboring O atoms and bond lengths .....                                                | 7 |
| Table S5. The volumes of individual molecular cages .....                                                                    | 7 |
| Note S2: The distances between neighboring molecular cages .....                                                             | 7 |
| Table S6. The distance of different molecular cages .....                                                                    | 8 |

**Table S1.** Number of molecular crystals with different space groups and configurations found through RG<sup>2</sup> search. Sum-X represents the total number of crystals found for each space group, while Sum-Y represents the total number of crystals found for each configuration. The percentages following the numerical values in SUM-X and SUM-Y represent the proportion of each corresponding space group or configuration, respectively, out of all crystals found. The cell at the intersection of the Sum-X and Sum-Y rows/columns, in the bottom right corner of the table, shows the total number of crystals found by RG<sup>2</sup> search (346).

| Space Group | r6x             | r68           | r68x            | r6           | r8x            | Sum-X       |
|-------------|-----------------|---------------|-----------------|--------------|----------------|-------------|
| 195         | 23              | 4             | 21              | 0            | 0              | 48(13.87%)  |
| 196         | 0               | 4             | 0               | 0            | 0              | 4(1.16%)    |
| 198         | 0               | 5             | 0               | 0            | 0              | 5(1.45%)    |
| 200         | 60              | 0             | 45              | 0            | 0              | 105(30.34%) |
| 208         | 0               | 15            | 5               | 0            | 0              | 20(5.78%)   |
| 213         | 0               | 3             | 0               | 0            | 0              | 3(0.87%)    |
| 215         | 54              | 2             | 29              | 0            | 0              | 85(24.57%)  |
| 216         | 0               | 0             | 0               | 5            | 0              | 5(1.45%)    |
| 218         | 4               | 0             | 0               | 0            | 0              | 4(1.16%)    |
| 221         | 2               | 0             | 13              | 0            | 52             | 67(19.36%)  |
| Sum-Y       | 143<br>(41.33%) | 33<br>(9.54%) | 113<br>(32.66%) | 5<br>(1.45%) | 52<br>(15.03%) | 346         |

8

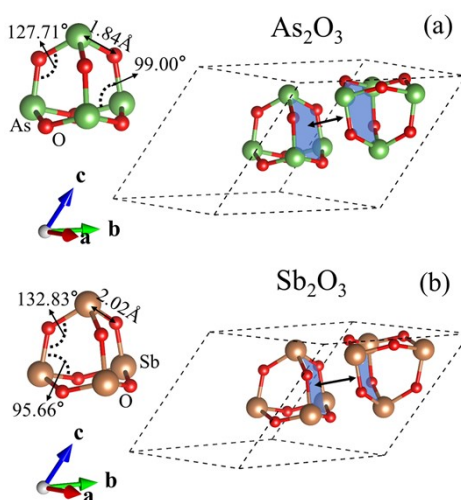

9

**Figure S1.** The primitive cell diagrams of As<sub>2</sub>O<sub>3</sub> (a) and Sb<sub>2</sub>O<sub>3</sub> (b). The blue-filled surfaces and black arrows indicate the nearest-neighbor contacts between adjacent molecular cages.

12

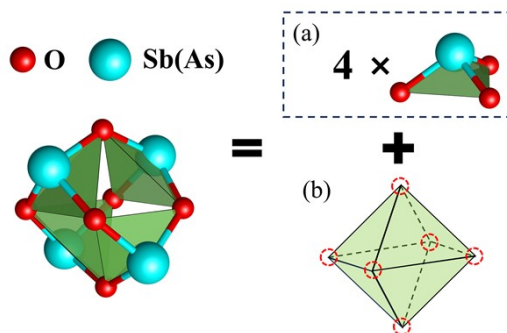

1

2 **Figure S2.** Decomposition diagram of molecular cage  $\text{As}_4\text{O}_6$  or  $\text{Sb}_4\text{O}_6$ . Each molecular cage  
 3 can be viewed as being composed of four triangular pyramids, with Sb (or As) atoms at the  
 4 apex and O atoms forming the base (a). Connecting the positions of the O atoms (indicated by  
 5 the red dashed circle lines) form a regular octahedron (b), and the center of which corresponds  
 6 to the center of the molecular cage.

7

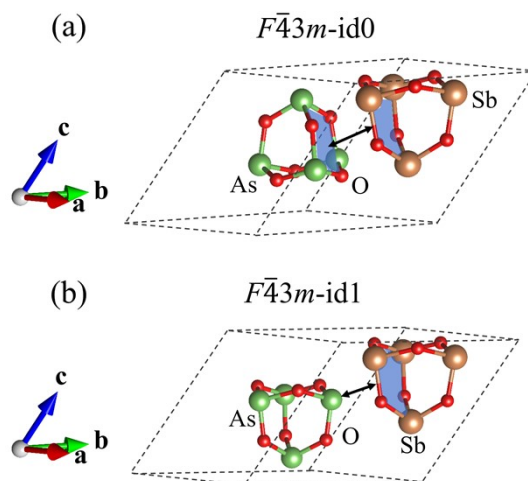

8

9 **Figure S3.** The primitive cell diagrams of  $F\bar{4}3m\text{-id}0$  (a) and  $F\bar{4}3m\text{-id}1$  (b). The blue-filled  
 10 surfaces and black arrows indicate the nearest-neighbor contacts between adjacent molecular  
 11 cages.

12

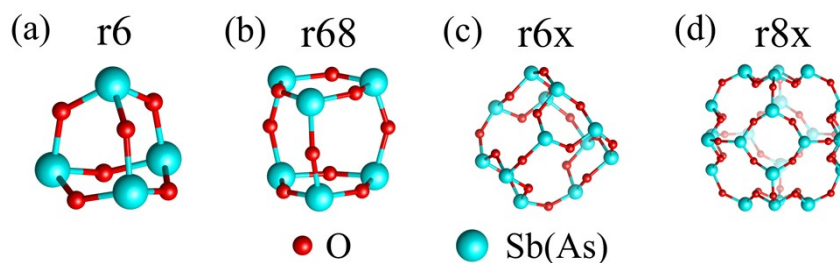

13

14

**Figure S4.** Example of different molecular cage structures.

15

16

17

**Table S2.** Descriptions of the molecular cages in various conformations of molecular crystals, as searched by RG<sup>2</sup>.

| Conformation | Crystal includes cages                                                      | Cages example                                                                                                    |
|--------------|-----------------------------------------------------------------------------|------------------------------------------------------------------------------------------------------------------|
| r6           | Containing six-membered rings only                                          | Figure S4a                                                                                                       |
| r68          | Containing six- and eight-membered rings                                    | Figure S4b                                                                                                       |
| r6x          | Containing six-membered rings and possibly eight- or twelve-membered rings  | Figure S4c. Other molecular cage configurations may be present in the unit cell, e.g., Figure S4a or Figure S4b. |
| r8x          | Containing eight-membered rings and possibly six- or twelve-membered rings  | Figure S4d. Other molecular cage configurations may be present in the unit cell, e.g., Figure S4a or Figure S4b. |
| r68x         | Containing six- and eight-membered rings and possibly twelve-membered rings | The unit cell contains multiple molecular cages, e.g., Figure S4b and S4c.                                       |

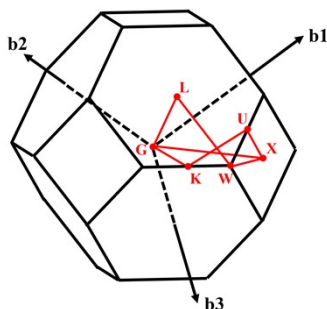

**Figure S5.** The first Brillouin zone of  $F\bar{4}3m\text{-id}0$ ,  $F\bar{4}3m\text{-id}1$ , and  $F\bar{4}3m\text{-id}2$ .

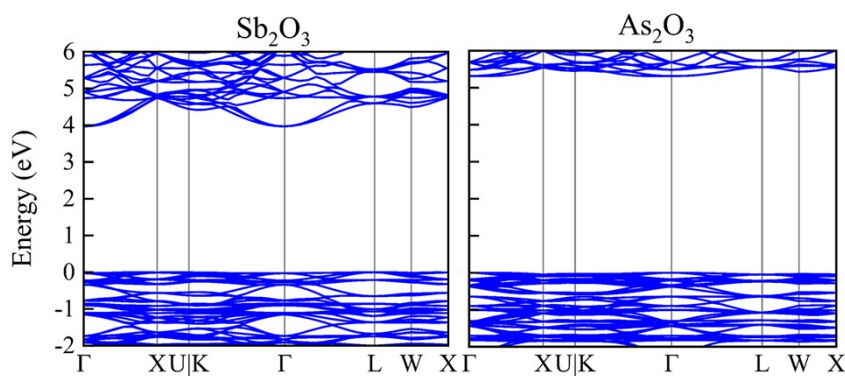

**Figure S6.** The HSE06 band structures of bulk  $\text{Sb}_2\text{O}_3$  and  $\text{As}_2\text{O}_3$ , with the band edges aligned relative to the valence band maximum (VBM).

|   |                                                                                                |                    |                    |
|---|------------------------------------------------------------------------------------------------|--------------------|--------------------|
| 1 | <b>Table S3.</b> POSCAR of stable hybrid molecular crystal $F\bar{4}3m$ -id0's primitive cell. |                    |                    |
|   | $F\bar{4}3m$ -id0 primitive cell                                                               |                    |                    |
|   | 1.000000                                                                                       |                    |                    |
|   | 0                                                                                              | 5.5144952748721501 | 5.5144952748721501 |
|   | 5.5144952748721501                                                                             | 0                  | 5.5144952748721501 |
|   | 5.5144952748721501                                                                             | 5.5144952748721501 | 0                  |
|   | Sb                                                                                             | O                  | As                 |
|   | 4                                                                                              | 12                 | 4                  |
|   | Direct                                                                                         |                    |                    |
|   | 0.3670133671905453                                                                             | 0.3670133671905453 | 0.3670133671905450 |
|   | 0.3670133671905453                                                                             | 0.3670133671905453 | 0.8989598984283642 |
|   | 0.3670133671905453                                                                             | 0.8989598984283642 | 0.3670133671905453 |
|   | 0.8989598984283642                                                                             | 0.3670133671905452 | 0.3670133671905451 |
|   | 0.1785114303508379                                                                             | 0.1785114303508379 | 0.8214885696491621 |
|   | 0.8214885696491621                                                                             | 0.8214885696491621 | 0.1785114303508379 |
|   | 0.8214885696491621                                                                             | 0.1785114303508379 | 0.1785114303508379 |
|   | 0.1785114303508379                                                                             | 0.8214885696491621 | 0.8214885696491621 |
|   | 0.1785114303508379                                                                             | 0.8214885696491621 | 0.1785114303508379 |
|   | 0.8214885696491621                                                                             | 0.1785114303508379 | 0.8214885696491621 |
|   | 0.0584172611418377                                                                             | 0.4415827388581623 | 0.0584172611418377 |
|   | 0.4415827388581623                                                                             | 0.0584172611418377 | 0.4415827388581623 |
|   | 0.0584172611418377                                                                             | 0.0584172611418377 | 0.4415827388581623 |
|   | 0.4415827388581623                                                                             | 0.4415827388581623 | 0.0584172611418377 |
|   | 0.4415827388581623                                                                             | 0.0584172611418377 | 0.0584172611418377 |
|   | 0.0584172611418377                                                                             | 0.4415827388581623 | 0.4415827388581623 |
|   | 0.8933415994694556                                                                             | 0.3199752015916333 | 0.8933415994694556 |
|   | 0.3199752015916333                                                                             | 0.8933415994694556 | 0.8933415994694556 |
|   | 0.8933415994694556                                                                             | 0.8933415994694556 | 0.8933415994694556 |
|   | 0.8933415994694556                                                                             | 0.8933415994694556 | 0.3199752015916333 |

## 2 Note S1: The volume calculation of molecular cages

3 As illustrated in Figure S2, the volume of each fully optimized molecular cage can  
 4 be decomposed into two components: (1) the volume of a regular octahedron ( $V_8$ ) with

1 O atoms at its vertices (Figure S2a) and (2) the volume of four triangular pyramids (  
 2  $V_3$ ) (Figure S2b). Therefore, the total volume ( $V$ ) of the molecular cage is calculated  
 3 using the following formula:

$$V = V_8 + 4 \times V_3 \quad (\text{S1})$$

$$V_8 = \frac{a^3}{6\sqrt{2}} \quad (\text{S2})$$

$$V_3 = \frac{1}{3} \times S \times h \quad (\text{S3})$$

4 In equation S2,  $a$  denotes the distance between two nearest-neighbor O atoms in the  
 5  $\text{Sb}_4\text{O}_6$  ( $\text{As}_4\text{O}_6$ ) molecular cages of various molecular crystals (see Figure S2 for details;  
 6 the nearest-neighbor O atom distance  $a$ , for  $\text{Sb}_4\text{O}_6$  ( $\text{As}_4\text{O}_6$ ) are summarized as  $a_1(a_2)$   
 7 in Table S4). In equation S3,  $S$  represents the base area of the triangular pyramid and  
 8  $h$  its height. The formulas for calculating  $S$  and  $h$  are as follows:

$$S = \frac{\sqrt{3}}{4} a^2 \quad (\text{S4})$$

$$h = \sqrt{b^2 - \left(\frac{1}{3}a^2\right)} \quad (\text{S5})$$

9 where  $b$  represents the Sb(As)-O bond length (see Figure S2 for details; where the  
 10 Sb(As)-O bond lengths ( $b$ ) for different molecular cages are summarized as  $b_1(b_2)$  in  
 11 Table S4). Combining equations S1-S5, we obtain the final formula for calculating the  
 12 volume of the molecular cage:

$$V = \frac{a^3}{6\sqrt{2}} + \sqrt{\frac{b^2 - \left(\frac{1}{3}a^2\right)}{3}} a^2 \quad (\text{S6})$$

$$= \frac{a^2}{3} \left( \frac{\sqrt{2}}{4} + \sqrt{3b^2 - a^2} \right)$$

By substituting the values of  $a$  and  $b$  for different molecular cages into the equation S6, we obtained the corresponding cage volumes. The volumes of the  $\text{Sb}_4\text{O}_6$  ( $\text{As}_4\text{O}_6$ ) cages are summarized as  $V_1$  ( $V_2$ ), in Table S5. Considering that the primitive cell of the hybrid molecular crystal contains one  $\text{Sb}_4\text{O}_6$  cage and one  $\text{As}_4\text{O}_6$  cage, for ease of comparison, we determine the total volume by summing the volumes of the  $\text{Sb}_4\text{O}_6$  cage ( $V_1$ ) and the  $\text{As}_4\text{O}_6$  cage ( $V_2$ ) in different molecular crystals and we designate this sum as  $V_p$ :

$$V_p = V_1 + V_2 \quad (\text{S7})$$

**Table S4.** The distance between the neighboring O atoms ( $a$ ) and the Sb (As)-O bond lengths ( $b$ ) in the molecular cage  $\text{Sb}_4\text{O}_6$  ( $\text{As}_4\text{O}_6$ ). To better distinguish between the  $a$  and  $b$  parameters in the  $\text{Sb}_4\text{O}_6$  and  $\text{As}_4\text{O}_6$  molecular cages, we define the nearest-neighbor O atom distance and the Sb-O bond length in  $\text{Sb}_4\text{O}_6$  as  $a_1$  and  $b_1$ , respectively, and the corresponding parameters in  $\text{As}_4\text{O}_6$  as  $a_2$  and  $b_2$ .

| Crystals                | $\text{Sb}_4\text{O}_6$ (Å) |                | $\text{As}_4\text{O}_6$ (Å) |                |
|-------------------------|-----------------------------|----------------|-----------------------------|----------------|
|                         | O···O ( $a_1$ )             | Sb-O ( $b_1$ ) | O···O ( $a_2$ )             | As-O ( $b_2$ ) |
| $F\bar{4}3m\text{-id0}$ | 2.988                       | 2.001          | 2.784                       | 1.843          |
| $F\bar{4}3m\text{-id1}$ | 2.992                       | 1.990          | 2.813                       | 1.830          |
| $F\bar{4}3m\text{-id2}$ | 2.987                       | 1.981          | 2.795                       | 1.822          |

**Table S5.** The volumes of individual molecular cages ( $V$ ) within various molecular crystals, as well as the overall volume of the primitive cell ( $V_p$ ). For the hybrid molecular crystals,  $V_p$  represents the sum of the volumes of the  $\text{Sb}_4\text{O}_6$  and  $\text{As}_4\text{O}_6$  cages within their respective primitive cells.

| Crystals                | $V$ (Å <sup>3</sup> )             |                                   | $V_p$ (Å <sup>3</sup> ) |
|-------------------------|-----------------------------------|-----------------------------------|-------------------------|
|                         | $\text{Sb}_4\text{O}_6$ ( $V_1$ ) | $\text{As}_4\text{O}_6$ ( $V_2$ ) |                         |
| $F\bar{4}3m\text{-id0}$ | 6.278                             | 4.948                             | 11.226                  |

|                         |       |       |        |
|-------------------------|-------|-------|--------|
| $F\bar{4}3m\text{-id1}$ | 6.161 | 4.785 | 10.946 |
| $F\bar{4}3m\text{-id2}$ | 6.073 | 4.736 | 10.809 |

## 1 **Note S2: The distances between neighboring molecular cages**

2 For the analysis of distances between nearest-neighbor molecular cages, we define  
3 the distance as that between the centroids of two adjacent cages. This corresponds to  
4 the distance ( $d$ ) between the centroids of the two central octahedra of these neighboring  
5 cages (see Figure S2b). Since each octahedron has six vertices that correspond to the  
6 six O atoms of the molecular cage (highlighted by the red dashed circles in Figure S2b),  
7 we can determine the centroid coordinates of each cage based on the three-dimensional  
8 (3D) coordinates of these O atoms. Finally, a pair of nearest-neighbor cages is randomly  
9 selected, and the  $d$  between their centroids is calculated. The statistical results are  
10 presented in Table S6.

11 **Table S6.** The distance ( $d$ ) of different molecular cages.

| Crystals | $F\bar{4}3m\text{-id0}$ | $F\bar{4}3m\text{-id1}$ | $F\bar{4}3m\text{-id2}$ |
|----------|-------------------------|-------------------------|-------------------------|
| $d$ (Å)  | 4.78                    | 5.99                    | 7.15                    |

12
